# Supplementary material
Source: PubMed Central journal article supplement (PMC8561699)

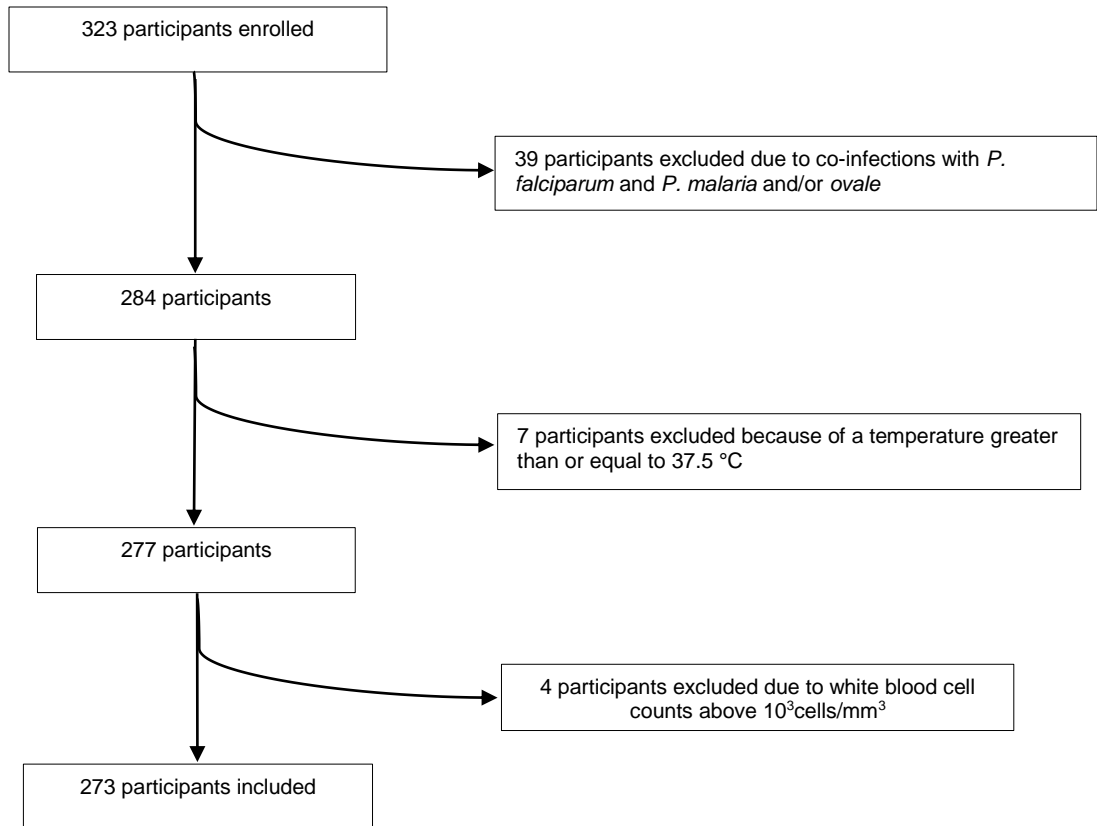

Supplement: CEI-206-395-s002.pdf [file CEI-206-395-s002.pdf]

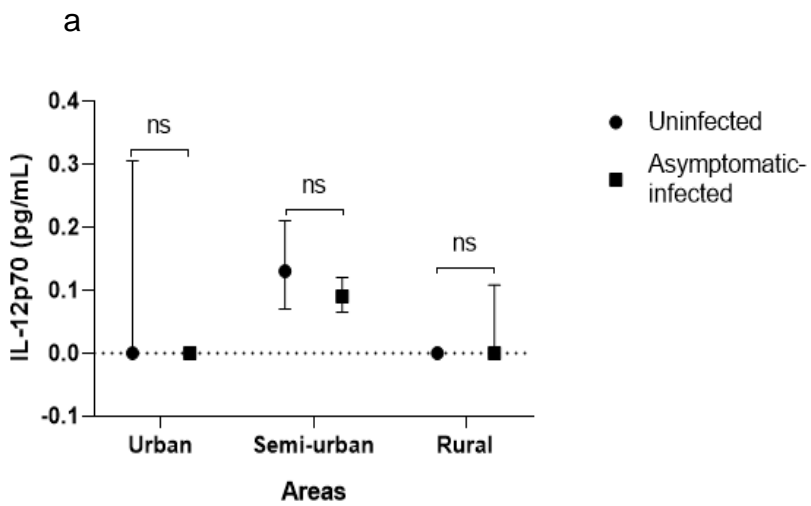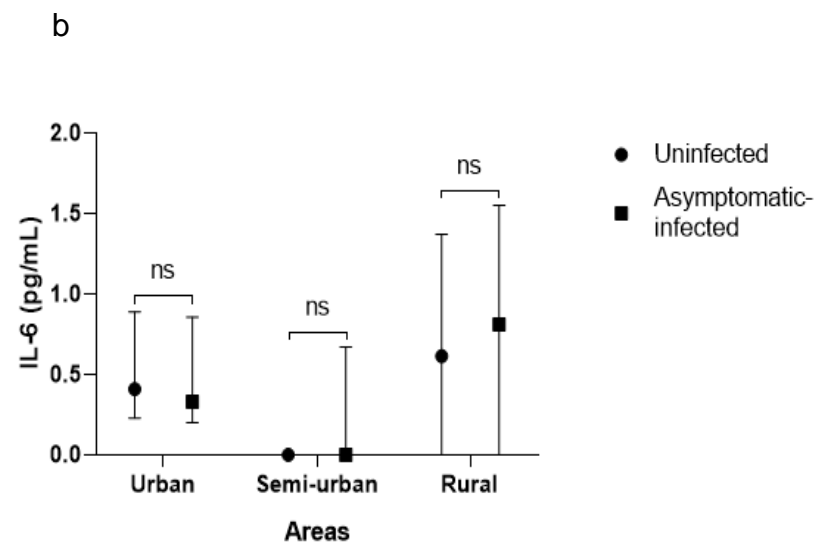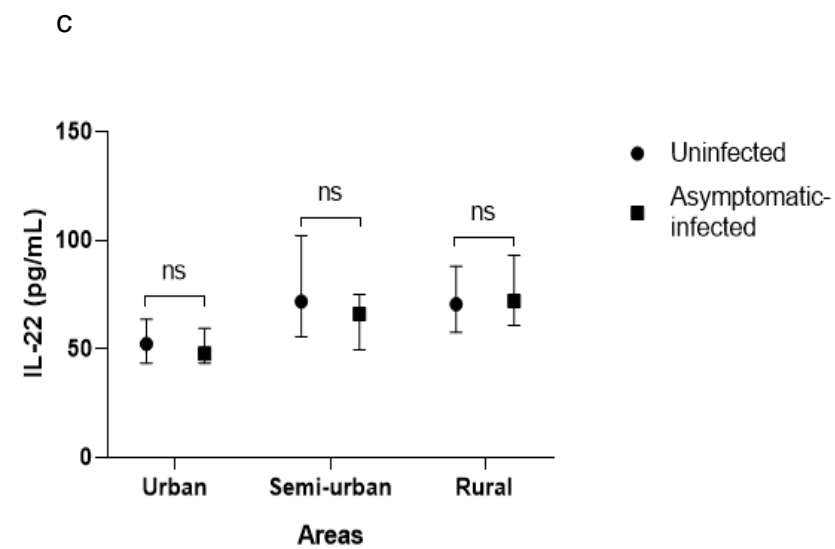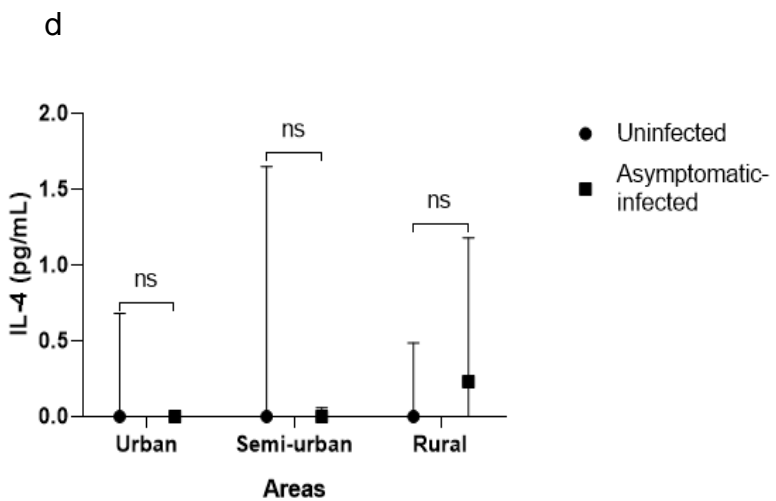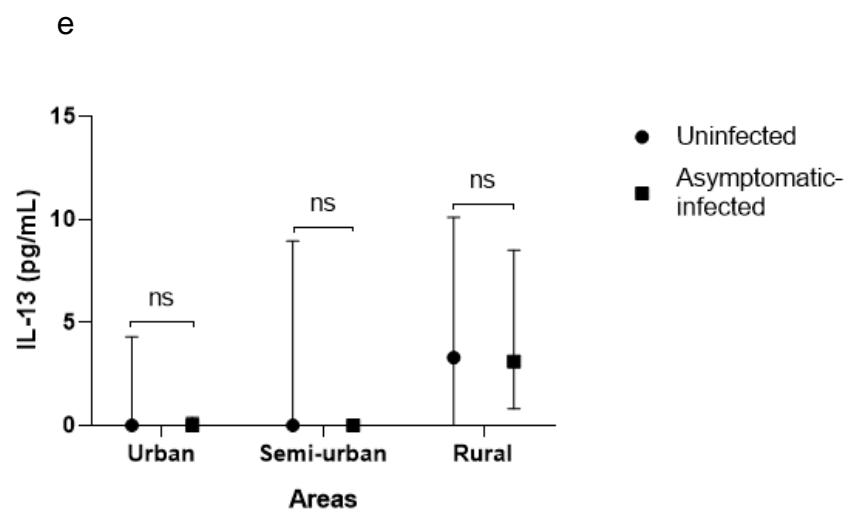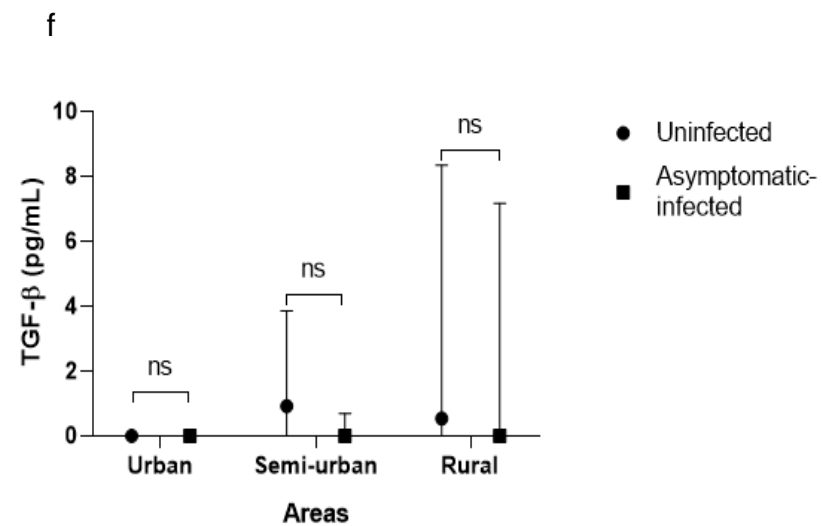

Supplement: CEI-206-395-s003.pdf [file CEI-206-395-s003.pdf]

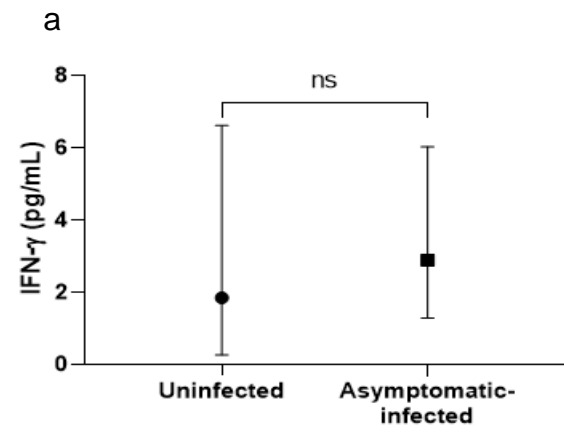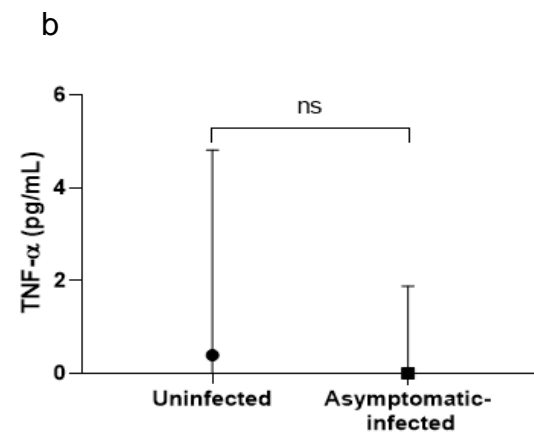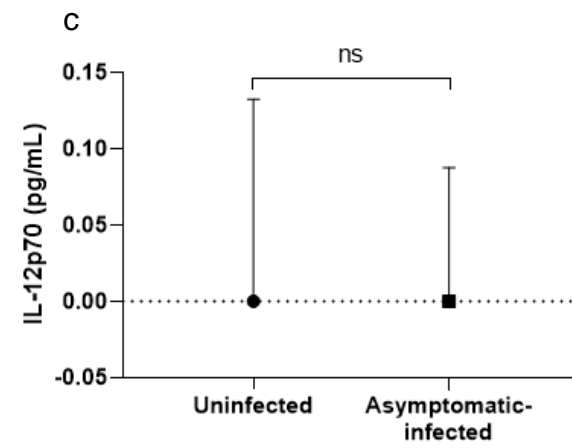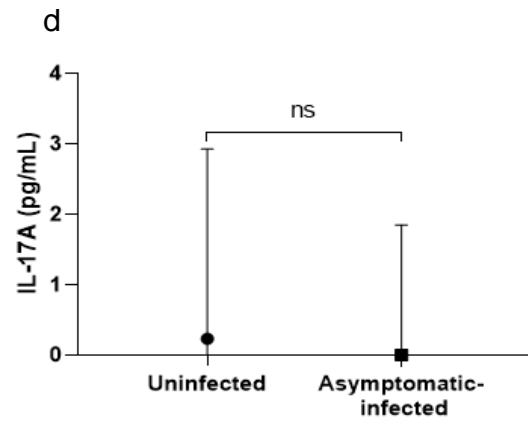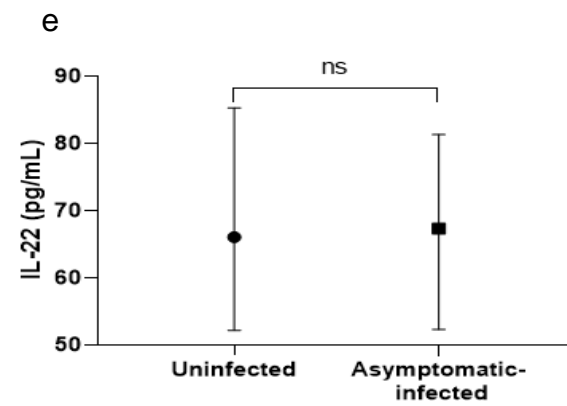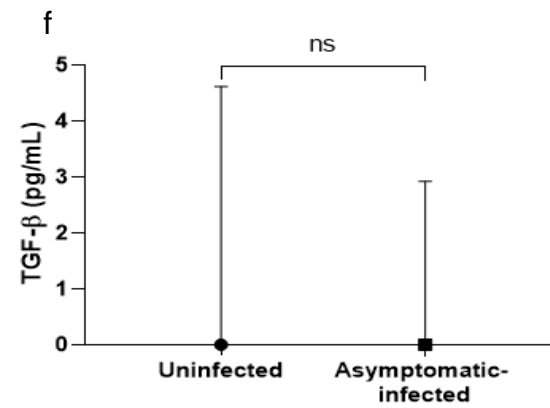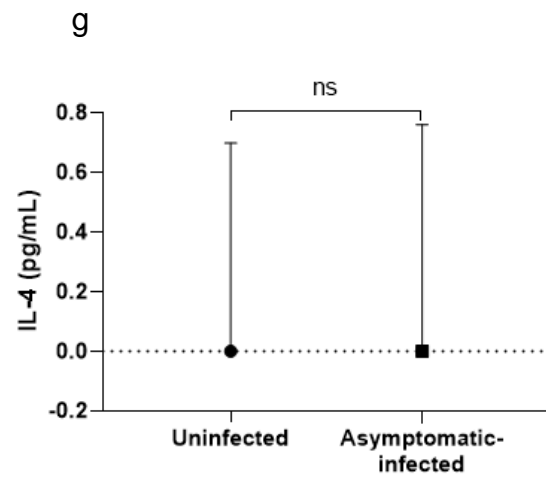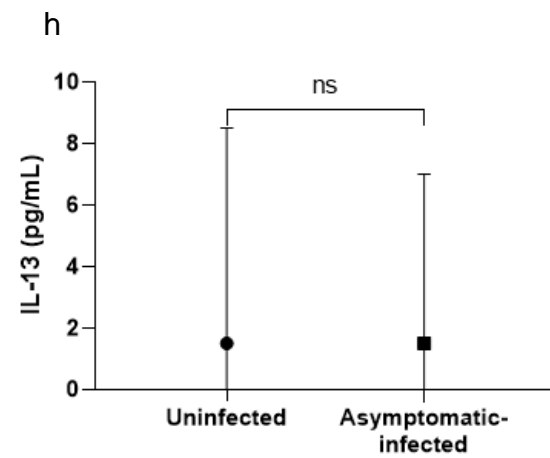

Supplement: CEI-206-395-s004.pdf [file CEI-206-395-s004.pdf]
